# Supplementary material for: Combination of Bacillus licheniformis and Salinomycin: Effect on the Growth Performance and GIT Microbial Populations of Broiler Chickens
Source: PubMed Central journal article supplement (PMC7278455; doi:10.3390/ani10050889), 2020-05-20
Supplement: animals-10-00889-s001.pdf [file animals-10-00889-s001.pdf]

**Table S1.** Effect of *Bacillus licheniformis* addition alone or in combination with salinomycin on the relative weight of selected sections of the gastrointestinal tract of broiler chicken.

| Treatment                             |                         | Weight, g/kg of BW |         |       |       | Length, cm/kg of BW |         |       |       |
|---------------------------------------|-------------------------|--------------------|---------|-------|-------|---------------------|---------|-------|-------|
| Salinomycin                           | <i>B. licheniformis</i> | Duodenum           | Jejunum | Ileum | Ceca  | Duodenum            | Jejunum | Ileum | Ceca  |
| -                                     | -                       | 0.69               | 1.27    | 0.81  | 0.30  | 1.47                | 3.59    | 3.32  | 0.69  |
| +                                     | -                       | 0.70               | 1.32    | 0.80  | 0.27  | 1.45                | 3.68    | 3.10  | 0.70  |
| -                                     | +                       | 0.68               | 1.27    | 0.82  | 0.24  | 1.39                | 3.43    | 3.08  | 0.66  |
| +                                     | +                       | 0.68               | 1.27    | 0.83  | 0.29  | 1.48                | 3.73    | 3.23  | 0.73  |
| Model RMSE <sup>1</sup>               |                         | 0.06               | 0.12    | 0.06  | 0.05  | 0.15                | 0.39    | 0.36  | 0.08  |
| Model P                               |                         | 0.879              | 0.724   | 0.802 | 0.086 | 0.583               | 0.343   | 0.425 | 0.353 |
| Main effects                          |                         |                    |         |       |       |                     |         |       |       |
| Salinomycin                           |                         |                    |         |       |       |                     |         |       |       |
| None                                  |                         | 0.69               | 1.27    | 0.81  | 0.27  | 1.43                | 3.51    | 3.20  | 0.67  |
| 60 mg/kg                              |                         | 0.69               | 1.29    | 0.81  | 0.28  | 1.47                | 3.70    | 3.17  | 0.71  |
| <i>B. licheniformis</i>               |                         |                    |         |       |       |                     |         |       |       |
| None                                  |                         | 0.70               | 1.30    | 0.80  | 0.29  | 1.46                | 3.63    | 3.22  | 0.69  |
| 1.6 × 10 <sup>9</sup> CFU/kg          |                         | 0.68               | 1.27    | 0.82  | 0.27  | 1.43                | 3.58    | 3.16  | 0.69  |
| <i>p</i> -value                       |                         |                    |         |       |       |                     |         |       |       |
| Salinomycin                           |                         | 0.760              | 0.567   | 0.767 | 0.721 | 0.494               | 0.122   | 0.793 | 0.121 |
| <i>B. licheniformis</i>               |                         | 0.458              | 0.441   | 0.463 | 0.152 | 0.533               | 0.648   | 0.651 | 0.962 |
| Interaction terms                     |                         |                    |         |       |       |                     |         |       |       |
| Salinomycin × <i>B. licheniformis</i> |                         | 0.913              | 0.540   | 0.554 | 0.340 | 0.301               | 0.406   | 0.119 | 0.367 |

<sup>1</sup> Root-mean-square error; means represent 10 pens of 1 chick each (10 replicates).

**Table S2.** Effect of dietary supplementation of *B. licheniformis* alone or in combination with salinomycin on selected ecological indices of the GIT microbiota in the crop, jejunum, and ceca of broiler chickens

| Treatment               |                                       | Crop               |                    |                    | Jejunum |                    |                    | Ceca   |                    |                   |
|-------------------------|---------------------------------------|--------------------|--------------------|--------------------|---------|--------------------|--------------------|--------|--------------------|-------------------|
| Salinomycin             | <i>B. licheniformis</i>               | Chao 1             | Shannon index (H') | Simpson's index D  | Chao 1  | Shannon index (H') | Simpson's index D  | Chao 1 | Shannon index (H') | Simpson's index D |
| -                       | -                                     | 131.0              | 1.15               | 0.54               | 259.4   | 2.61 <sup>a</sup>  | 0.84 <sup>a</sup>  | 67.7   | 1.95               | 0.74              |
| +                       | -                                     | 145.8              | 1.39               | 0.63               | 270.3   | 1.97 <sup>b</sup>  | 0.71 <sup>b</sup>  | 66.9   | 2.23               | 0.81              |
| -                       | +                                     | 113.7              | 0.83               | 0.37               | 247.7   | 1.94 <sup>b</sup>  | 0.69 <sup>b</sup>  | 80.7   | 2.12               | 0.79              |
| +                       | +                                     | 120.7              | 0.84               | 0.39               | 281.1   | 2.33 <sup>ab</sup> | 0.79 <sup>ab</sup> | 64.69  | 2.32               | 0.83              |
| SEM <sup>1</sup>        |                                       | 4.47               | 0.08               | 0.03               | 5.75    | 0.1                | 0.02               | 2.35   | 0.05               | 0.01              |
| Model P                 |                                       | 0.008              | 0.002              | <0.001             | 0.1999  | 0.033              | 0.046              | 0.051  | 0.023              | 0.043             |
| Main effects            |                                       |                    |                    |                    |         |                    |                    |        |                    |                   |
| Salinomycin             |                                       |                    |                    |                    |         |                    |                    |        |                    |                   |
|                         | None                                  | 122.3              | 0.99               | 0.45               | 253.5   | 2.28               | 0.76               | 74.21  | 2.04 <sup>b</sup>  | 0.76 <sup>b</sup> |
|                         | 60 mg/kg                              | 133.3              | 1.11               | 0.51               | 275.7   | 2.15               | 0.75               | 65.80  | 2.27 <sup>a</sup>  | 0.82 <sup>a</sup> |
| <i>B. licheniformis</i> |                                       |                    |                    |                    |         |                    |                    |        |                    |                   |
|                         | None                                  | 138.4 <sup>a</sup> | 1.27 <sup>a</sup>  | 0.583 <sup>a</sup> | 264.9   | 2.29               | 0.78               | 67.31  | 2.09               | 0.774             |
|                         | 1.6 × 10 <sup>9</sup> CFU/kg          | 117.2 <sup>b</sup> | 0.84 <sup>b</sup>  | 0.380 <sup>b</sup> | 264.4   | 2.13               | 0.74               | 72.70  | 2.22               | 0.808             |
| <i>p</i> -value         |                                       |                    |                    |                    |         |                    |                    |        |                    |                   |
|                         | Salinomycin                           | 0.211              | 0.331              | 0.261              | 0.060   | 0.447              | 0.747              | 0.054  | 0.007              | 0.015             |
|                         | <i>B. licheniformis</i>               | 0.023              | 0.003              | <0.001             | 0.965   | 0.357              | 0.364              | 0.202  | 0.115              | 0.135             |
| Interaction terms       |                                       |                    |                    |                    |         |                    |                    |        |                    |                   |
|                         | Salinomycin × <i>B. licheniformis</i> | 0.650              | 0.339              | 0.502              | 0.316   | 0.007              | 0.008              | 0.079  | 0.583              | 0.589             |

<sup>a-b</sup>Means not sharing a common superscript differ significantly ( $p < 0.05$ ); <sup>1</sup> standard error of the mean; means represent 2 birds pooled from 10 randomly chosen from each treatment (5 replicates).

**Table S3.** Effect of dietary supplementation of *B. licheniformis* alone or in combination with salinomycin on the relative abundance (at the phylum level) of the dominant microbiota populations in the crop of broiler chickens.

| Treatment               |                                       | Crop – phylum level |                    |                    |                |               |
|-------------------------|---------------------------------------|---------------------|--------------------|--------------------|----------------|---------------|
| Salinomycin             | <i>B. licheniformis</i>               | Firmicutes          | Cyanobacteria      | Proteobacteria     | Actinobacteria | Bacteroidetes |
| -                       | -                                     | 63.85               | 22.79              | 12.12              | 0.77           | 0.24          |
| +                       | -                                     | 48.96               | 30.39              | 18.74              | 0.74           | 0.94          |
| -                       | +                                     | 79.17               | 12.75              | 6.77               | 0.95           | 0.14          |
| +                       | +                                     | 77.52               | 15.11              | 6.42               | 0.68           | 0.19          |
|                         | SEM <sup>1</sup>                      | 3.87                | 2.26               | 1.59               | 0.08           | 0.19          |
|                         | Model P                               | 0.007               | 0.011              | 0.007              | 0.695          | 0.646         |
| Main effects            |                                       |                     |                    |                    |                |               |
| Salinomycin             |                                       |                     |                    |                    |                |               |
|                         | None                                  | 71.51               | 17.77              | 9.44               | 0.86           | 0.19          |
|                         | 60 mg/kg                              | 63.24               | 22.75              | 12.58              | 0.71           | 0.56          |
| <i>B. licheniformis</i> |                                       |                     |                    |                    |                |               |
|                         | None                                  | 56.40 <sup>b</sup>  | 26.59 <sup>a</sup> | 15.43 <sup>a</sup> | 0.76           | 0.59          |
|                         | 1.6 × 10 <sup>9</sup> CFU/kg          | 78.35 <sup>a</sup>  | 13.93 <sup>b</sup> | 6.59 <sup>b</sup>  | 0.82           | 0.16          |
| <i>p</i> -value         |                                       |                     |                    |                    |                |               |
|                         | Salinomycin                           | 0.176               | 0.175              | 0.212              | 0.382          | 0.595         |
|                         | <i>B. licheniformis</i>               | 0.002               | 0.002              | 0.002              | 0.715          | 0.305         |
| Interaction terms       |                                       |                     |                    |                    |                |               |
|                         | Salinomycin × <i>B. licheniformis</i> | 0.273               | 0.466              | 0.168              | 0.482          | 0.569*        |

<sup>a-b</sup>Means not sharing a common superscript differ significantly ( $p < 0.05$ ); <sup>1</sup> standard error of the mean; \* nonparametric post hoc Dunn's test after the Scheirer-Ray-Hare test; means represent 2 birds pooled from 10 randomly chosen from each treatment (5 replicates).

**Table S4.** Effect of dietary supplementation of *B. licheniformis* alone or in combination with salinomycin on the relative abundance (at the phylum level) of the dominant microbiota populations in the jejunum of broiler chickens.

| Treatment               |                                       | Jejunum – phylum level |                    |                |                |               |  |
|-------------------------|---------------------------------------|------------------------|--------------------|----------------|----------------|---------------|--|
| Salinomycin             | <i>B. licheniformis</i>               | Firmicutes             | Cyanobacteria      | Proteobacteria | Actinobacteria | Bacteroidetes |  |
| -                       | -                                     | 36.70                  | 21.97              | 34.03          | 4.40           | 0.03          |  |
| +                       | -                                     | 35.00                  | 28.23              | 30.89          | 4.92           | 0.14          |  |
| -                       | +                                     | 57.09                  | 13.44              | 21.87          | 6.50           | 0.16          |  |
| +                       | +                                     | 45.61                  | 18.33              | 29.23          | 5.06           | 0.19          |  |
| SEM                     |                                       | 4.12                   | 2.00               | 2.44           | 0.53           | 0.03          |  |
| Model P                 |                                       | 0.214                  | 0.046              | 0.361          | 0.249          | 0.379         |  |
| Main effects            |                                       |                        |                    |                |                |               |  |
| Salinomycin             |                                       |                        |                    |                |                |               |  |
|                         | None                                  | 46.89                  | 17.70              | 27.95          | 5.45           | 0.10          |  |
|                         | 60 mg/kg                              | 40.31                  | 23.28              | 30.06          | 4.99           | 0.17          |  |
| <i>B. licheniformis</i> |                                       |                        |                    |                |                |               |  |
|                         | None                                  | 35.85                  | 25.10 <sup>a</sup> | 32.46          | 4.66           | 0.09          |  |
|                         | 1.6 × 10 <sup>9</sup> CFU/kg          | 51.35                  | 15.89 <sup>b</sup> | 25.55          | 5.78           | 0.18          |  |
| <i>p</i> -value         |                                       |                        |                    |                |                |               |  |
|                         | Salinomycin                           | 0.413                  | 0.121              | 0.668          | 0.151          | 0.326         |  |
|                         | <i>B. licheniformis</i>               | 0.066                  | 0.016              | 0.171          | 0.650          | 0.190         |  |
| Interaction terms       |                                       |                        |                    |                |                |               |  |
|                         | Salinomycin × <i>B. licheniformis</i> | 0.542                  | 0.843              | 0.292          | 0.174*         | 0.541         |  |

<sup>a-b</sup>Means not sharing a common superscript differ significantly ( $p < 0.05$ ); <sup>1</sup> standard error of the mean; \* nonparametric post hoc Dunn's test after the Scheirer-Ray-Hare test; means represent 2 birds pooled from 10 randomly chosen from each treatment (5 replicates).

**Table S5.** Effect of dietary supplementation of *B. licheniformis* alone or in combination with salinomycin on the relative abundance (at the phylum level) of the dominant microbiota populations in the ceca of broiler chickens.

| Treatment                             |                         | Ceca – phylum level |                |                   |               |             |
|---------------------------------------|-------------------------|---------------------|----------------|-------------------|---------------|-------------|
| Salinomycin                           | <i>B. licheniformis</i> | Firmicutes          | Proteobacteria | Actinobacteria    | Bacteroidetes | Tenericutes |
| -                                     | -                       | 88.4                | 6.33           | 1.17              | 0.39          | 3.33        |
| +                                     | -                       | 87.1                | 5.58           | 1.85              | 0.54          | 3.99        |
| -                                     | +                       | 88.5                | 4.38           | 1.87              | 0.82          | 4.02        |
| +                                     | +                       | 87.9                | 4.28           | 2.21              | 0.54          | 2.85        |
| SEM                                   |                         | 0.96                | 0.35           | 0.13              | 0.15          | 0.35        |
| Model P                               |                         | 0.539               | 0.436          | 0.022             | 0.684         | 0.615       |
| Main effects                          |                         |                     |                |                   |               |             |
| Salinomycin                           |                         |                     |                |                   |               |             |
| None                                  |                         | 88.4                | 5.35           | 1.52 <sup>b</sup> | 0.60          | 3.68        |
| 60 mg/kg                              |                         | 87.5                | 4.93           | 2.03 <sup>a</sup> | 0.54          | 3.42        |
| <i>B. licheniformis</i>               |                         |                     |                |                   |               |             |
| None                                  |                         | 87.8                | 5.96           | 1.51 <sup>b</sup> | 0.46          | 3.66        |
| 1.6 × 10 <sup>9</sup> CFU/kg          |                         | 88.2                | 4.33           | 2.04 <sup>a</sup> | 0.68          | 3.44        |
| <i>p</i> -value                       |                         |                     |                |                   |               |             |
| Salinomycin                           |                         | 0.199               | 0.733          | 0.028             | 0.650         | 0.723       |
| <i>B. licheniformis</i>               |                         | 0.821               | 0.256          | 0.024             | 0.364         | 0.758       |
| Interaction terms                     |                         |                     |                |                   |               |             |
| Salinomycin × <i>B. licheniformis</i> |                         | 0.496*              | 0.426*         | 0.435             | 0.496*        | 0.222       |

<sup>a-b</sup>Means not sharing a common superscript differ significantly ( $p < 0.05$ ); <sup>1</sup> standard error of the mean; \* nonparametric post hoc Dunn's test after the Scheirer-Ray-Hare test; means represent 2 birds pooled from 10 randomly chosen from each treatment (5 replicates).

**Table S6.** Effect of dietary supplementation of *B. licheniformis* alone or in combination with salinomycin on the relative abundance (at the family level) of the dominant microbiota populations in the crop of broiler chickens.

| Treatment                             |                         | Crop – family level |                    |                            |                    |                  |  |
|---------------------------------------|-------------------------|---------------------|--------------------|----------------------------|--------------------|------------------|--|
| Salinomycin                           | <i>B. licheniformis</i> | Lactobacillaceae    | Unidentified       | Rickettsiales_mitochondria | Enterobacteriaceae | Streptococcaceae |  |
| -                                     | -                       | 61.55               | 22.85              | 10.00                      | 1.16               | 1.34             |  |
| +                                     | -                       | 46.85               | 30.43              | 13.63                      | 2.14               | 0.41             |  |
| -                                     | +                       | 77.81               | 12.79              | 5.76                       | 0.38               | 0.44             |  |
| +                                     | +                       | 75.28               | 15.14              | 5.90                       | 0.22               | 1.32             |  |
| SEM                                   |                         | 3.94                | 2.26               | 1.06                       | 0.29               | 0.35             |  |
| Model P                               |                         | 0.007               | 0.011              | 0.010                      | 0.033              | 0.240            |  |
| Main effects                          |                         |                     |                    |                            |                    |                  |  |
| Salinomycin                           |                         |                     |                    |                            |                    |                  |  |
| None                                  |                         | 69.68               | 17.82              | 7.88                       | 0.77               | 0.89             |  |
| 60 mg/kg                              |                         | 61.07               | 22.78              | 9.76                       | 1.18               | 0.86             |  |
| <i>B. licheniformis</i>               |                         |                     |                    |                            |                    |                  |  |
| None                                  |                         | 54.20 <sup>b</sup>  | 26.64 <sup>a</sup> | 11.81 <sup>a</sup>         | 1.65 <sup>a</sup>  | 0.87             |  |
| 1.6 × 10 <sup>9</sup> CFU/kg          |                         | 76.55 <sup>a</sup>  | 13.97 <sup>b</sup> | 5.83 <sup>b</sup>          | 0.30 <sup>b</sup>  | 0.88             |  |
| <i>p</i> -value                       |                         |                     |                    |                            |                    |                  |  |
| Salinomycin                           |                         | 0.167               | 0.176              | 0.264                      | 0.910              | 0.176            |  |
| <i>B. licheniformis</i>               |                         | 0.002               | 0.002              | 0.002                      | 0.005              | 0.189            |  |
| Interaction terms                     |                         |                     |                    |                            |                    |                  |  |
| Salinomycin × <i>B. licheniformis</i> |                         | 0.322               | 0.467              | 0.299                      | 0.405*             | 0.417*           |  |

<sup>a-b</sup>Means not sharing a common superscript differ significantly ( $p < 0.05$ ); <sup>1</sup> standard error of the mean; \* nonparametric post hoc Dunn's test after the Scheirer-Ray-Hare test; means represent 2 birds pooled from 10 randomly chosen from each treatment (5 replicates).

**Table S7.** Effect of dietary supplementation of *B. licheniformis* alone or in combination with salinomycin on the relative abundance (at the family level) of the dominant microbiota populations in the jejunum of broiler chickens.

| Treatment               |                                       | Jejunum – family level |                    |                                |                        |                     |                        |                      |                     |                   |  |
|-------------------------|---------------------------------------|------------------------|--------------------|--------------------------------|------------------------|---------------------|------------------------|----------------------|---------------------|-------------------|--|
| Salinomycin             | <i>B. licheniformis</i>               | Lactobacilla<br>ceae   | Unidenti<br>fied   | Rickettsiales_mitoc<br>hondria | Enterobacteri<br>aceae | Ruminococc<br>aceae | Corynebacteri<br>aceae | Streptococc<br>aceae | Lachnospir<br>aceae | Bacillac<br>eae   |  |
| -                       | -                                     | 19.12                  | 23.81              | 19.36                          | 11.03 <sup>a</sup>     | 3.54                | 1.19                   | 2.32                 | 1.23                | 0.92              |  |
| +                       | -                                     | 26.20                  | 28.98              | 24.82                          | 4.50 <sup>b</sup>      | 1.53                | 2.88                   | 0.41                 | 1.41                | 0.00              |  |
| -                       | +                                     | 46.03                  | 14.69              | 15.03                          | 4.86 <sup>b</sup>      | 3.14                | 3.84                   | 0.00                 | 1.09                | 1.10              |  |
| +                       | +                                     | 27.83                  | 19.20              | 18.92                          | 7.91 <sup>ab</sup>     | 1.12                | 3.04                   | 6.72                 | 0.00                | 2.47              |  |
| SEM                     |                                       | 4.84                   | 2.02               | 1.98                           | 0.92                   | 0.56                | 0.75                   | 1.27                 | 0.27                | 0.32              |  |
| Model P                 |                                       | 0.249                  | 0.058              | 0.401                          | 0.024                  | 0.361               | 0.680                  | 0.410                | 0.169               | 0.039             |  |
| Main effects            |                                       |                        |                    |                                |                        |                     |                        |                      |                     |                   |  |
| Salinomycin             |                                       |                        |                    |                                |                        |                     |                        |                      |                     |                   |  |
|                         | None                                  | 32.58                  | 19.25              | 17.19                          | 7.948                  | 3.34                | 2.51                   | 1.16                 | 1.16                | 1.01              |  |
|                         | 60 mg/kg                              | 27.01                  | 24.09              | 21.87                          | 6.206                  | 1.33                | 2.96                   | 3.56                 | 0.70                | 1.24              |  |
| <i>B. licheniformis</i> |                                       |                        |                    |                                |                        |                     |                        |                      |                     |                   |  |
|                         | None                                  | 22.66                  | 26.40 <sup>a</sup> | 22.09                          | 7.77                   | 2.53                | 2.03                   | 1.36                 | 1.32                | 0.46 <sup>b</sup> |  |
|                         | 1.6 × 10 <sup>9</sup> CFU/kg          | 36.93                  | 16.95 <sup>b</sup> | 16.97                          | 6.39                   | 2.13                | 3.44                   | 3.36                 | 0.55                | 1.79 <sup>a</sup> |  |
| <i>p</i> -value         |                                       |                        |                    |                                |                        |                     |                        |                      |                     |                   |  |
|                         | Salinomycin                           | 0.558                  | 0.186              | 0.253                          | 0.263                  | 0.088               | 0.338                  | 0.256                | 0.457               | 0.682             |  |
|                         | <i>B. licheniformis</i>               | 0.145                  | 0.016              | 0.213                          | 0.372                  | 0.720               | 0.491                  | 0.829                | 0.186               | 0.027             |  |
| Interaction terms       |                                       |                        |                    |                                |                        |                     |                        |                      |                     |                   |  |
|                         | Salinomycin × <i>B. licheniformis</i> | 0.194                  | 0.927              | 0.845                          | 0.006                  | 0.997               | 0.730*                 | 0.214*               | 0.098*              | 0.051             |  |

<sup>a-b</sup>Means not sharing a common superscript differ significantly ( $p < 0.05$ ); <sup>1</sup> standard error of the mean; \* nonparametric post hoc Dunn's test after the Scheirer-Ray-Hare test; means represent 2 birds pooled from 10 randomly chosen from each treatment (5 replicates).

**Table S8.** Effect of dietary supplementation of *B. licheniformis* alone or in combination with salinomycin on the relative abundance (at the family level) of the dominant microbiota populations in the ceca of broiler chickens.

| Treatment               |                              | Ceca – family level     |             |                    |                 |                    |                   |                    |                   |        |
|-------------------------|------------------------------|-------------------------|-------------|--------------------|-----------------|--------------------|-------------------|--------------------|-------------------|--------|
| Salinomycin             | <i>B. licheniformis</i>      | Ruminococcaceae         | Unidentifie | Lachnospiracea     | Lactobacillacea | Enterobacteriaceae | Coriobacteriaceae | Clostridiaceae     | Streptococcaceae  |        |
| n                       | s                            | e                       | d           | e                  | e               | e                  | e                 | e                  | e                 |        |
| -                       | -                            | 50.0                    | 18.63       | 12.68              | 6.29            | 6.23               | 0.70              | 1.25 <sup>a</sup>  | 0.00              |        |
| +                       | -                            | 42.9                    | 17.87       | 15.65              | 7.35            | 5.57               | 1.48              | 0.00 <sup>b</sup>  | 3.58              |        |
| -                       | +                            | 44.6                    | 20.39       | 14.69              | 8.97            | 4.17               | 1.56              | 0.19 <sup>b</sup>  | 0.00              |        |
| +                       | +                            | 39.7                    | 12.50       | 21.46              | 8.69            | 4.18               | 1.84              | 0.54 <sup>ab</sup> | 6.65              |        |
| SEM                     |                              | 1.50                    | 1.17        | 1.20               | 0.75            | 1.07               | 0.22              | 0.15               | 0.98              |        |
| Model P                 |                              | 0.149                   | 0.085       | 0.045              | 0.589           | 0.601              | 0.311             | 0.014              | 0.007             |        |
| Main effects            |                              |                         |             |                    |                 |                    |                   |                    |                   |        |
| Salinomycin             |                              |                         |             |                    |                 |                    |                   |                    |                   |        |
|                         | None                         | 47.3 <sup>a</sup>       | 19.51       | 13.69 <sup>b</sup> | 7.63            | 5.20               | 1.09              | 0.72               | 0.00 <sup>b</sup> |        |
|                         | 60 mg/kg                     | 41.3 <sup>b</sup>       | 15.19       | 18.56 <sup>a</sup> | 8.02            | 4.87               | 1.70              | 0.27               | 5.19 <sup>a</sup> |        |
| <i>B. licheniformis</i> |                              |                         |             |                    |                 |                    |                   |                    |                   |        |
|                         | None                         | 46.5                    | 18.25       | 14.17              | 6.82            | 5.90               | 1.13              | 0.62               | 2.36              |        |
|                         | 1.6 × 10 <sup>9</sup> CFU/kg | 42.2                    | 16.45       | 18.07              | 8.83            | 4.17               | 1.66              | 0.37               | 2.84              |        |
| <i>p</i> -value         |                              |                         |             |                    |                 |                    |                   |                    |                   |        |
|                         | Salinomycin                  | 0.049                   | 0.055       | 0.031              | 0.804           | 0.733              | 0.177             | 0.105              | 0.001             |        |
|                         | <i>B. licheniformis</i>      | 0.227                   | 0.402       | 0.075              | 0.208           | 0.306              | 0.231             | 0.370              | 0.579             |        |
| Interaction terms       |                              |                         |             |                    |                 |                    |                   |                    |                   |        |
| Salinomycin             | x                            | <i>B. licheniformis</i> | 0.940*      | 0.108              | 0.369           | 0.668              | 0.404*            | 0.571              | 0.007*            | 0.579* |

<sup>a-b</sup>Means not sharing a common superscript differ significantly ( $p < 0.05$ ); <sup>1</sup> standard error of the mean; \* nonparametric post hoc Dunn's test after the Scheirer-Ray-Hare test; means represent 2 birds pooled from 10 randomly chosen from each treatment (5 replicates).
